# Supplementary material for: The Application of Thermal Decomposition for Determination of Carbonate Acid-Neutralising Capacity for Improved Acid Mine Drainage Prediction
Source: MDPI journal article supplement (doi:10.3390/min11111181), 2021-10-25
Supplement: s1 [file s1]

**Table S1** Bulk assay concentrations for the single carbonate minerals samples (ppm unless stated otherwise).

|          | Magnesite<br>MgCO <sub>3</sub> | Siderite<br>FeCO <sub>3</sub> | Rhodochrosite<br>MnCO <sub>3</sub> | Dolomite<br>CaMg(CO <sub>3</sub> ) <sub>2</sub> | Calcite<br>CaCO <sub>3</sub> | Azurite<br>Cu <sub>3</sub> (CO <sub>3</sub> ) <sub>2</sub> (OH) <sub>2</sub> | Malachite<br>Cu <sub>2</sub> CO <sub>3</sub> (OH) <sub>2</sub> | Ankerite<br>Ca(Fe,Mg,Mn)(CO <sub>3</sub> ) <sub>2</sub> |
|----------|--------------------------------|-------------------------------|------------------------------------|-------------------------------------------------|------------------------------|------------------------------------------------------------------------------|----------------------------------------------------------------|---------------------------------------------------------|
| Ag       | <2                             | <2                            | 82                                 | <2                                              | <2                           | 8                                                                            | <2                                                             | 8                                                       |
| Al (wt%) | 0.005                          | 0.04                          | 0.04                               | 0.04                                            | 0.005                        | 0.56                                                                         | 0.02                                                           | 0.275                                                   |
| As       | <10                            | 40                            | 220                                | <10                                             | <10                          | 40                                                                           | 20                                                             | 20                                                      |
| Ba       | <20                            | <20                           | <20                                | <20                                             | <20                          | <20                                                                          | <20                                                            | 40                                                      |
| Bi       | <20                            | 20                            | <20                                | <20                                             | <20                          | <20                                                                          | <20                                                            | <20                                                     |
| Ca (wt%) | 4.08                           | 0.16                          | 2.92                               | 23.2                                            | 40.4                         | 0.03                                                                         | 0.02                                                           | 4.28                                                    |
| Cd       | <5                             | <5                            | <5                                 | <5                                              | <5                           | <5                                                                           | <5                                                             | 550                                                     |
| Co       | <2                             | 18                            | 26                                 | 4                                               | <2                           | <2                                                                           | 116                                                            | 16                                                      |
| Cr       | <20                            | <20                           | <20                                | <20                                             | <20                          | <20                                                                          | <20                                                            | <20                                                     |
| Cu (wt%) | 0.0028                         | 0.0452                        | 0.0088                             | 0.0022                                          | 0.002                        | 55.7                                                                         | 59.4                                                           | 0.0318                                                  |
| Fe (wt%) | 0.02                           | 41.7                          | 0.54                               | 0.85                                            | 0.02                         | 0.15                                                                         | 0.03                                                           | 11.2                                                    |
| K (wt%)  | 0.04                           | <0.01                         | 0.02                               | 0.06                                            | 0.025                        | 0.01                                                                         | 0.03                                                           | 0.06                                                    |
| Li       | <10                            | <10                           | <10                                | <10                                             | <10                          | <10                                                                          | <10                                                            | 160                                                     |
| Mg (wt%) | 25.4                           | 3.46                          | 0.225                              | 11.8                                            | 0.105                        | 0.05                                                                         | 0.025                                                          | 1.56                                                    |
| Mn (wt%) | <0.005                         | 1.25                          | 43.2                               | 0.06                                            | <0.005                       | 0.015                                                                        | <0.005                                                         | 0.825                                                   |
| Mo       | <5                             | <5                            | <5                                 | <5                                              | <5                           | 10                                                                           | <5                                                             | <5                                                      |
| Na (wt%) | 0.04                           | 0.01                          | 0.01                               | 0.04                                            | 0.025                        | <0.01                                                                        | <0.01                                                          | 0.03                                                    |
| Ni       | 86                             | 12                            | <2                                 | 8                                               | 2                            | 12                                                                           | <2                                                             | 10                                                      |
| P (wt%)  | <0.005                         | <0.005                        | 0.02                               | <0.005                                          | 0.0075                       | <0.005                                                                       | 0.19                                                           | 0.02                                                    |
| Pb       | 100                            | 20                            | 280                                | <10                                             | <10                          | 370                                                                          | 350                                                            | 40                                                      |
| S        | <50                            | 1300                          | 0.24 (wt%)                         | 250                                             | 525                          | 100                                                                          | <50                                                            | 6.99 (wt%)                                              |
| Sc       | <1                             | <1                            | 2                                  | <1                                              | <1                           | 19                                                                           | <1                                                             | <1                                                      |
| Si (wt%) | 0.345                          | 1.21                          | 1.35                               | 0.12                                            | 0.0125                       | 0.88                                                                         | 0.06                                                           | 18.6                                                    |
| Sr       | 38                             | 2                             | 2                                  | 60                                              | 144                          | <2                                                                           | <2                                                             | 76                                                      |
| Ti (wt%) | <0.005                         | <0.005                        | <0.005                             | <0.005                                          | <0.005                       | 0.02                                                                         | <0.005                                                         | 0.01                                                    |
| V        | <5                             | <5                            | <5                                 | <5                                              | <5                           | <5                                                                           | 20                                                             | 10                                                      |
| Y        | <10                            | <10                           | 20                                 | <10                                             | <10                          | 10                                                                           | <10                                                            | <10                                                     |
| Zn       | 28                             | 32                            | 618                                | <2                                              | <2                           | 52                                                                           | 62                                                             | 13.5 (wt%)                                              |
| Zr       | <20                            | <20                           | 40                                 | <20                                             | <20                          | <20                                                                          | <20                                                            | <20                                                     |

**Table S2** Single carbonate CO<sub>2</sub> and weight loss data for thermal decomposition in O<sub>2</sub> carrier gas

| LECO Total C<br>(wt%)                                                     | CO <sub>2</sub><br>(wt%, total possible) | Temperature<br>(°C) | Weight loss<br>(wt%) | Generated CO <sub>2</sub><br>(% of total possible) |
|---------------------------------------------------------------------------|------------------------------------------|---------------------|----------------------|----------------------------------------------------|
| Calcite CaCO <sub>3</sub>                                                 |                                          |                     |                      |                                                    |
| 11.3                                                                      | 41                                       | 400                 | 0.80                 | 1.9                                                |
|                                                                           |                                          | 500                 | 0.60                 | 1.4                                                |
|                                                                           |                                          | 600                 | 2.40                 | 5.7                                                |
|                                                                           |                                          | 700                 | 27.40                | 65                                                 |
|                                                                           |                                          | 800                 | 44.20                | 105                                                |
| Malachite Cu <sub>2</sub> (CO <sub>3</sub> )(OH) <sub>2</sub>             |                                          |                     |                      |                                                    |
| 4.2                                                                       | 16                                       | 400                 | 28                   | 100                                                |
|                                                                           |                                          | 500                 | 28                   | 101                                                |
|                                                                           |                                          | 600                 | 28                   | 102                                                |
|                                                                           |                                          | 700                 | 28                   | 101                                                |
|                                                                           |                                          | 800                 | 29                   | 104                                                |
| Dolomite CaMg(CO <sub>3</sub> ) <sub>2</sub>                              |                                          |                     |                      |                                                    |
| 13.1                                                                      | 48                                       | 400                 | 0.00                 | 0                                                  |
|                                                                           |                                          | 500                 | 2.0                  | 4                                                  |
|                                                                           |                                          | 600                 | 4.0                  | 8                                                  |
|                                                                           |                                          | 700                 | 23                   | 47                                                 |
|                                                                           |                                          | 800                 | 47                   | 98                                                 |
| Azurite Cu <sub>3</sub> (CO <sub>3</sub> ) <sub>2</sub> (OH) <sub>2</sub> |                                          |                     |                      |                                                    |
| 5.30                                                                      | 19                                       | 400                 | 30                   | 99                                                 |
|                                                                           |                                          | 500                 | 30                   | 99                                                 |
|                                                                           |                                          | 600                 | 30                   | 97                                                 |
|                                                                           |                                          | 700                 | 30                   | 98                                                 |
|                                                                           |                                          | 800                 | 30                   | 98                                                 |
| Rhodochrosite MnCO <sub>3</sub>                                           |                                          |                     |                      |                                                    |
| 11.2                                                                      | 41                                       | 400                 | 4                    | 11                                                 |
|                                                                           |                                          | 500                 | 12                   | 30                                                 |
|                                                                           |                                          | 600                 | 20                   | 48                                                 |
|                                                                           |                                          | 700                 | 30                   | 73                                                 |
|                                                                           |                                          | 800                 | 31                   | 77                                                 |
| Magnesite MgCO <sub>3</sub>                                               |                                          |                     |                      |                                                    |
| 14.3                                                                      | 52                                       | 400                 | 1.4                  | 2.7                                                |
|                                                                           |                                          | 450                 | 3.0                  | 5.7                                                |
|                                                                           |                                          | 500                 | 14                   | 26                                                 |
|                                                                           |                                          | 550                 | 41                   | 79                                                 |
|                                                                           |                                          | 600                 | 44                   | 84                                                 |
|                                                                           |                                          | 700                 | 51                   | 97                                                 |
|                                                                           |                                          | 800                 | 51                   | 97                                                 |

**Table S2** Continued.

| LECO Total C<br>(wt%)                                | CO <sub>2</sub><br>(wt%, total<br>possible) | Temperature<br>(°C) | Weight loss<br>(wt%) | Generated CO <sub>2</sub><br>(% of total possible) |
|------------------------------------------------------|---------------------------------------------|---------------------|----------------------|----------------------------------------------------|
| Ankerite Ca(Fe,Mg,Mn)(CO <sub>3</sub> ) <sub>2</sub> |                                             |                     |                      |                                                    |
| 4.7                                                  | 17                                          | 400                 | 1.1                  | 6.4                                                |
|                                                      |                                             | 500                 | 5.8                  | 34                                                 |
|                                                      |                                             | 600                 | 6.5                  | 38                                                 |
|                                                      |                                             | 700                 | 6.7                  | 39                                                 |
|                                                      |                                             | 800                 | 7.6                  | 44                                                 |
|                                                      |                                             | 900                 | 9.9                  | 58                                                 |
|                                                      |                                             | 1000                | 12.7                 | 74                                                 |
| Siderite FeCO <sub>3</sub>                           |                                             |                     |                      |                                                    |
| 11.1                                                 | 41                                          | 450                 | 8.0                  | 19                                                 |
|                                                      |                                             | 500                 | 21                   | 53                                                 |
|                                                      |                                             | 550                 | 30                   | 73                                                 |
|                                                      |                                             | 600                 | 32                   | 79                                                 |
|                                                      |                                             | 700                 | 33                   | 81                                                 |
|                                                      |                                             | 800                 | 33                   | 81                                                 |

**Table S3** CO and CO<sub>2</sub> emissions and weight loss for siderite thermal decomposition in O<sub>2</sub> carrier gas.

| LECO Total C<br>(wt%)            | CO <sub>2</sub><br>(wt%, total possible) | Temperature<br>(°C) | Weight loss<br>(wt%) | Generated CO<br>(% of total possible) | Generated CO <sub>2</sub><br>(% of total possible) | Generated CO +<br>CO <sub>2</sub> (as CO <sub>2</sub><br>combined) <sup>4</sup> |
|----------------------------------|------------------------------------------|---------------------|----------------------|---------------------------------------|----------------------------------------------------|---------------------------------------------------------------------------------|
| <b>Siderite FeCO<sub>3</sub></b> |                                          |                     |                      |                                       |                                                    |                                                                                 |
| 11.1                             | 41                                       | 450                 | 9.3                  | 0.00                                  | 23                                                 | 23                                                                              |
|                                  |                                          | 500                 | 21                   | 0.00                                  | 53                                                 | 53                                                                              |
|                                  |                                          | 550                 | 30                   | 0.05                                  | 73                                                 | 73                                                                              |
|                                  |                                          | 600                 | 32                   | 0.51                                  | 74                                                 | 75                                                                              |
|                                  |                                          | 700                 | 32                   | 0.68                                  | 78                                                 | 79                                                                              |

**Table S4** CO and CO<sub>2</sub> emissions and weight loss for siderite thermal decomposition in N<sub>2</sub> carrier gas.

| LECO Total C<br>(wt%)           | CO <sub>2</sub><br>(wt%, total possible) | Temperature<br>(°C) | Weight loss<br>(wt%) | Generated CO<br>(% of total possible) | Generated CO <sub>2</sub><br>(% of total possible) | Generated CO +<br>CO <sub>2</sub> (as CO <sub>2</sub><br>combined) <sup>4</sup> |
|---------------------------------|------------------------------------------|---------------------|----------------------|---------------------------------------|----------------------------------------------------|---------------------------------------------------------------------------------|
| Rhodochrosite MnCO <sub>3</sub> |                                          |                     |                      |                                       |                                                    |                                                                                 |
| 11.2                            | 41                                       | 450                 | 7.5                  | 0.17                                  | 18                                                 | 18                                                                              |
|                                 |                                          | 500                 | 17                   | 0.13                                  | 43                                                 | 43                                                                              |
|                                 |                                          | 550                 | 27                   | 0.50                                  | 67                                                 | 68                                                                              |
|                                 |                                          | 600                 | 34                   | 0.34                                  | 82                                                 | 83                                                                              |
|                                 |                                          | 700                 | 35                   | 0.17                                  | 83                                                 | 84                                                                              |
| Magnesite MgCO <sub>3</sub>     |                                          |                     |                      |                                       |                                                    |                                                                                 |
| 14.3                            | 52                                       | 450                 | 3.3                  | 0.10                                  | 6.0                                                | 6.2                                                                             |
|                                 |                                          | 500                 | 12                   | 0.47                                  | 22                                                 | 23                                                                              |
|                                 |                                          | 550                 | 43                   | 0.55                                  | 75                                                 | 76                                                                              |
|                                 |                                          | 600                 | 44                   | 0.63                                  | 81                                                 | 82                                                                              |
|                                 |                                          | 700                 | 50                   | 0.13                                  | 95                                                 | 95                                                                              |
| Siderite FeCO <sub>3</sub>      |                                          |                     |                      |                                       |                                                    |                                                                                 |
| 11.1                            | 41                                       | 450                 | 24                   | 2.2                                   | 56                                                 | 59                                                                              |
|                                 |                                          | 500                 | 34                   | 6.8                                   | 73                                                 | 84                                                                              |
|                                 |                                          | 550                 | 35                   | 12                                    | 66                                                 | 85                                                                              |
|                                 |                                          | 600                 | 35                   | 13                                    | 66                                                 | 86                                                                              |
|                                 |                                          | 700                 | 36                   | 5.4                                   | 78                                                 | 86                                                                              |
